# Supplementary material for: Proteomic Analysis of Human Milk Reveals Nutritional and Immune Benefits in the Colostrum from Mothers with COVID-19
Source: MDPI journal article supplement (doi:10.3390/nu14122513), 2022-06-17
Supplement: s1 [file s1]

## Supplementary Materials for manuscript entitled

### Proteomic analysis of human milk reveals nutritional and immune benefits in the colostrum from mothers with COVID-19

Juanjuan Guo<sup>a,d,#</sup>, Minjie Tan<sup>b,#</sup>, Jing Zhu<sup>c</sup>, , Ye Tian<sup>b</sup>, Huanyu Liu<sup>a,d</sup>, Fan Luo<sup>e</sup>, Jianbin Wang<sup>f</sup>, Yanyi Huang<sup>b,g</sup>, Yuanzhen Zhang<sup>a,d,h</sup>, Yuexin Yang<sup>i</sup>, Guanbo Wang<sup>b,g</sup>, 

<sup>a</sup> Department of Gynaecology and Obstetrics, Zhongnan Hospital of Wuhan University, Wuhan, Hubei Province 430071, China

<sup>b</sup> Institute for Cell Analysis, Shenzhen Bay Laboratory, Shenzhen, Guangdong Province 518132, China

<sup>c</sup> Institute of Biotechnology and Health, Beijing Academy of Science and Technology, 100089, Beijing, China

<sup>d</sup> Hubei Clinical Research Center for Prenatal Diagnosis and Birth Health, Wuhan 430071, China

<sup>e</sup> State Key Laboratory of Virology/Institute of Medical Virology, School of Basic Medical Sciences, Wuhan University, Wuhan 430071, China

<sup>f</sup> School of Life Sciences and Tsinghua-Peking Center for Life Sciences, Tsinghua University, Beijing 100084, China

<sup>g</sup> Biomedical Pioneering Innovation Center, Peking University, Beijing 100871, China

<sup>h</sup> Hubei Provincial Key Laboratory of Developmentally Originated Disease, Wuhan, Hubei Province 430071, China

<sup>i</sup> National Institute for Nutrition and Health, Chinese Center for Disease Control and Prevention, Beijing, 100050, China

# Equal contribution to this work

#### Table of Contents

Supplementary Figures..... S2-S7

Supplementary Table Captions .....S8

---

 Jing Zhu, Email: jingzhu.nutri@outlook.com

 Guanbo Wang, Email: guanbo.wang@pku.edu.cn

## SUPPLEMENTARY FIGURES

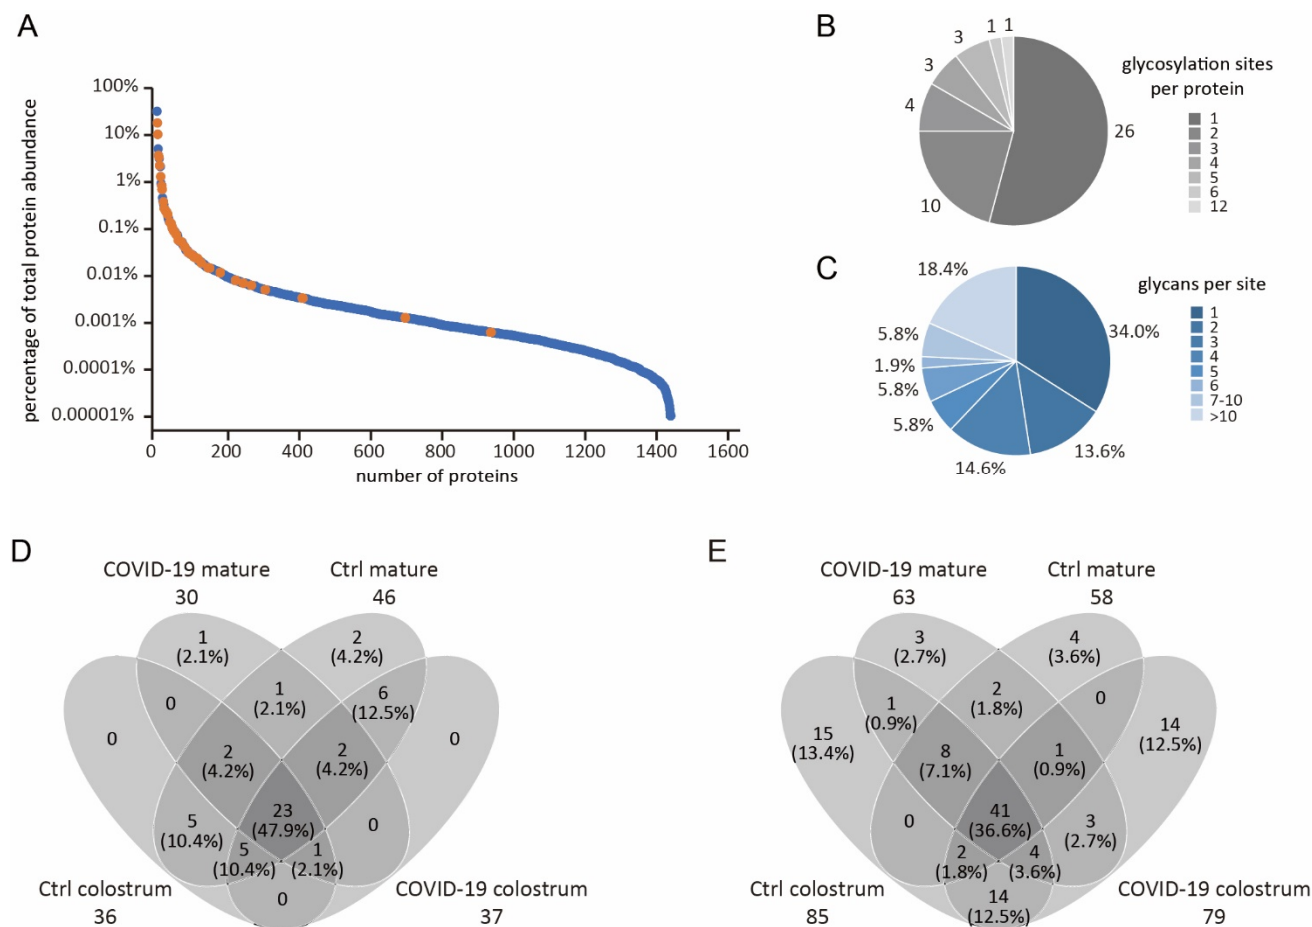

**Figure S1.** Overview of *N*-glycoproteomes in different sample groups. **(A)** Dynamic range of identified proteins. Orange dots indicate identified glycoproteins and blue dots represent proteins without identified glycosylation sites. **(B)** Distributions of the numbers of glycosylation sites detected at each identified glycoprotein. **(C)** Distributions of the glycosylation sites detected with different numbers of glycans. **(D and E)** Venn diagrams illustrating **(D)** the numbers of glycoproteins and **(E)** the numbers of glycopeptides identified in each sample group.

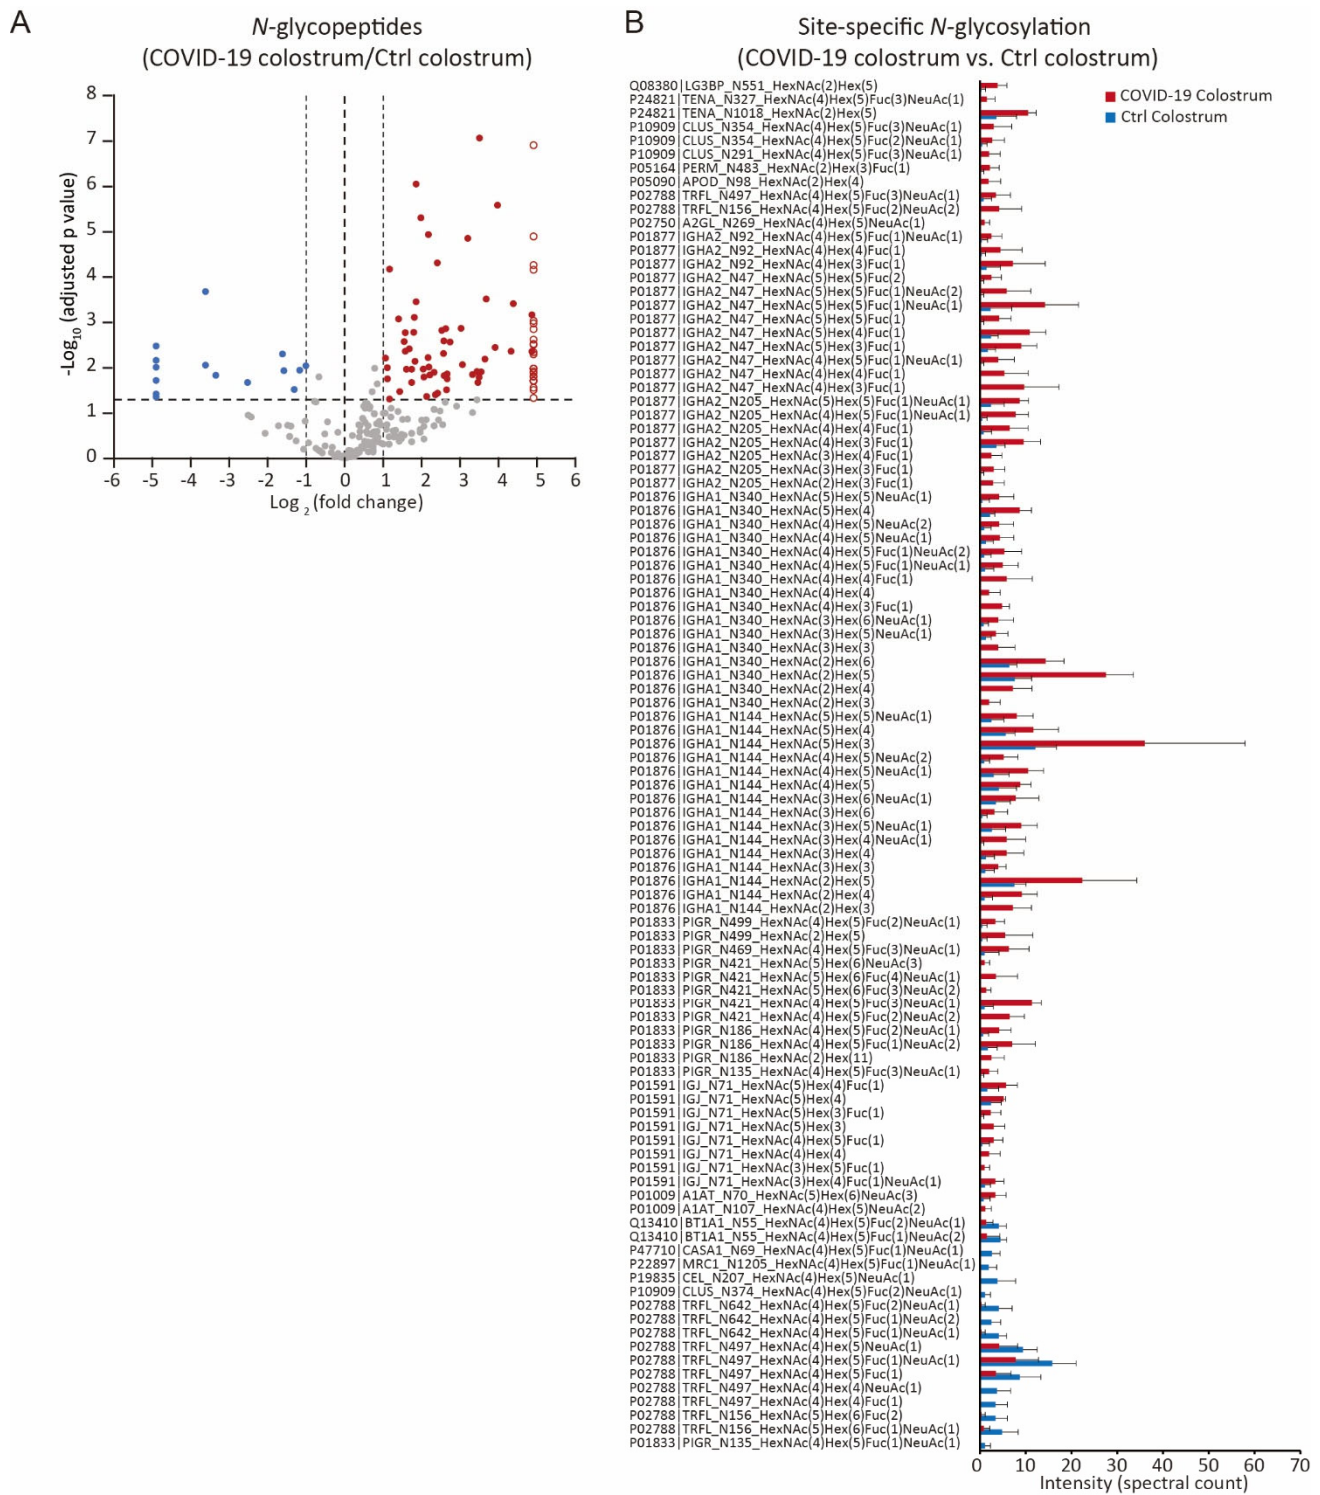

**Figure S2.** Comparison of *N*-glycoproteome profiles in the COVID-19 colostrum and Ctrl colostrum groups. **(A)** A volcano plot showing changes in glycopeptides. The open circles represent glycopeptides that were exclusively detectable in the COVID-19 colostrum group; their abundances in the COVID-19 mature group were manually set as a fixed minimum quantitative value, thereby giving rise to an identical fold-change value in the plot. **(B)** A bar graph showing changes in site-specific *N*-glycosylation. Bars indicate means and whiskers indicate SDs.

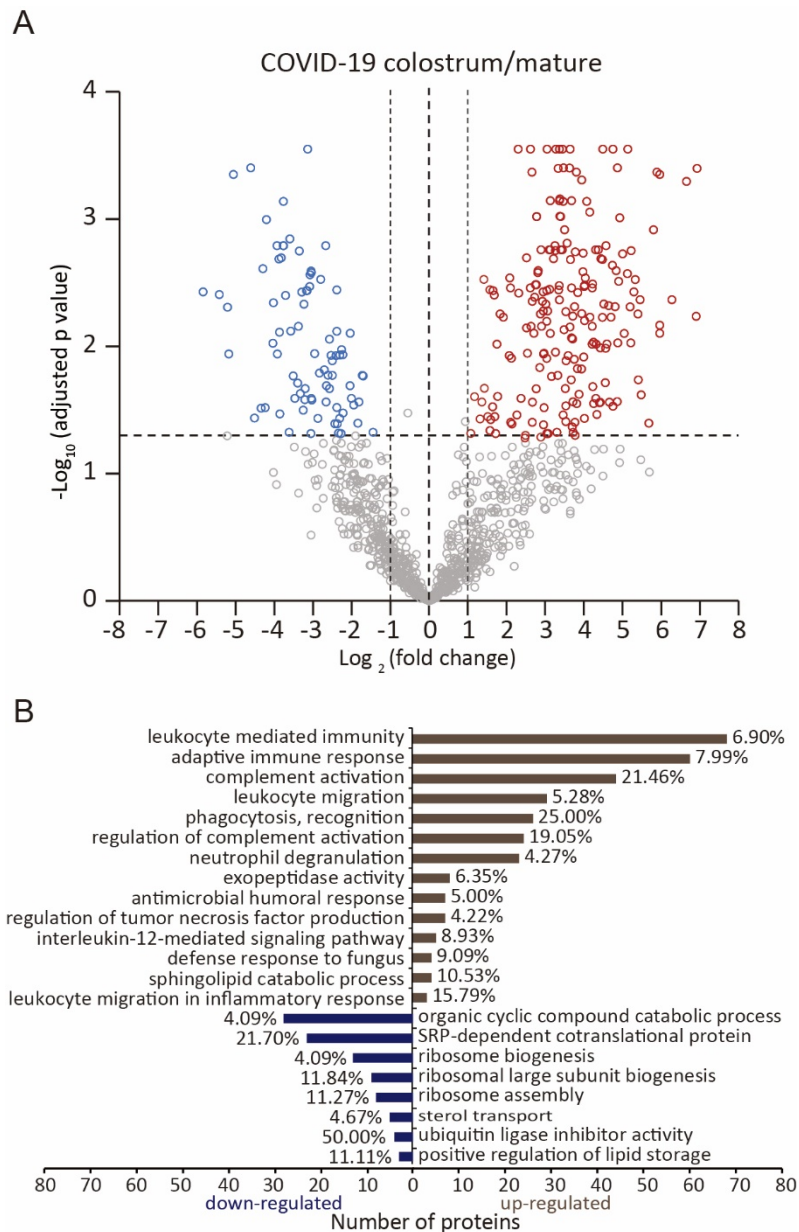

**Figure S3.** Comparison of COVID-19 colostrum and COVID-19 mature sample group proteomes. **(A)** A volcano plot of proteomes in COVID-19 colostrum and COVID-19 mature milk. **(B)** Enriched biological processes of differentially expressed proteins ( $p$  of each Gene Ontology [GO] term < 0.0002). The graph shows both numbers and percentages of differently expressed proteins in each term group.

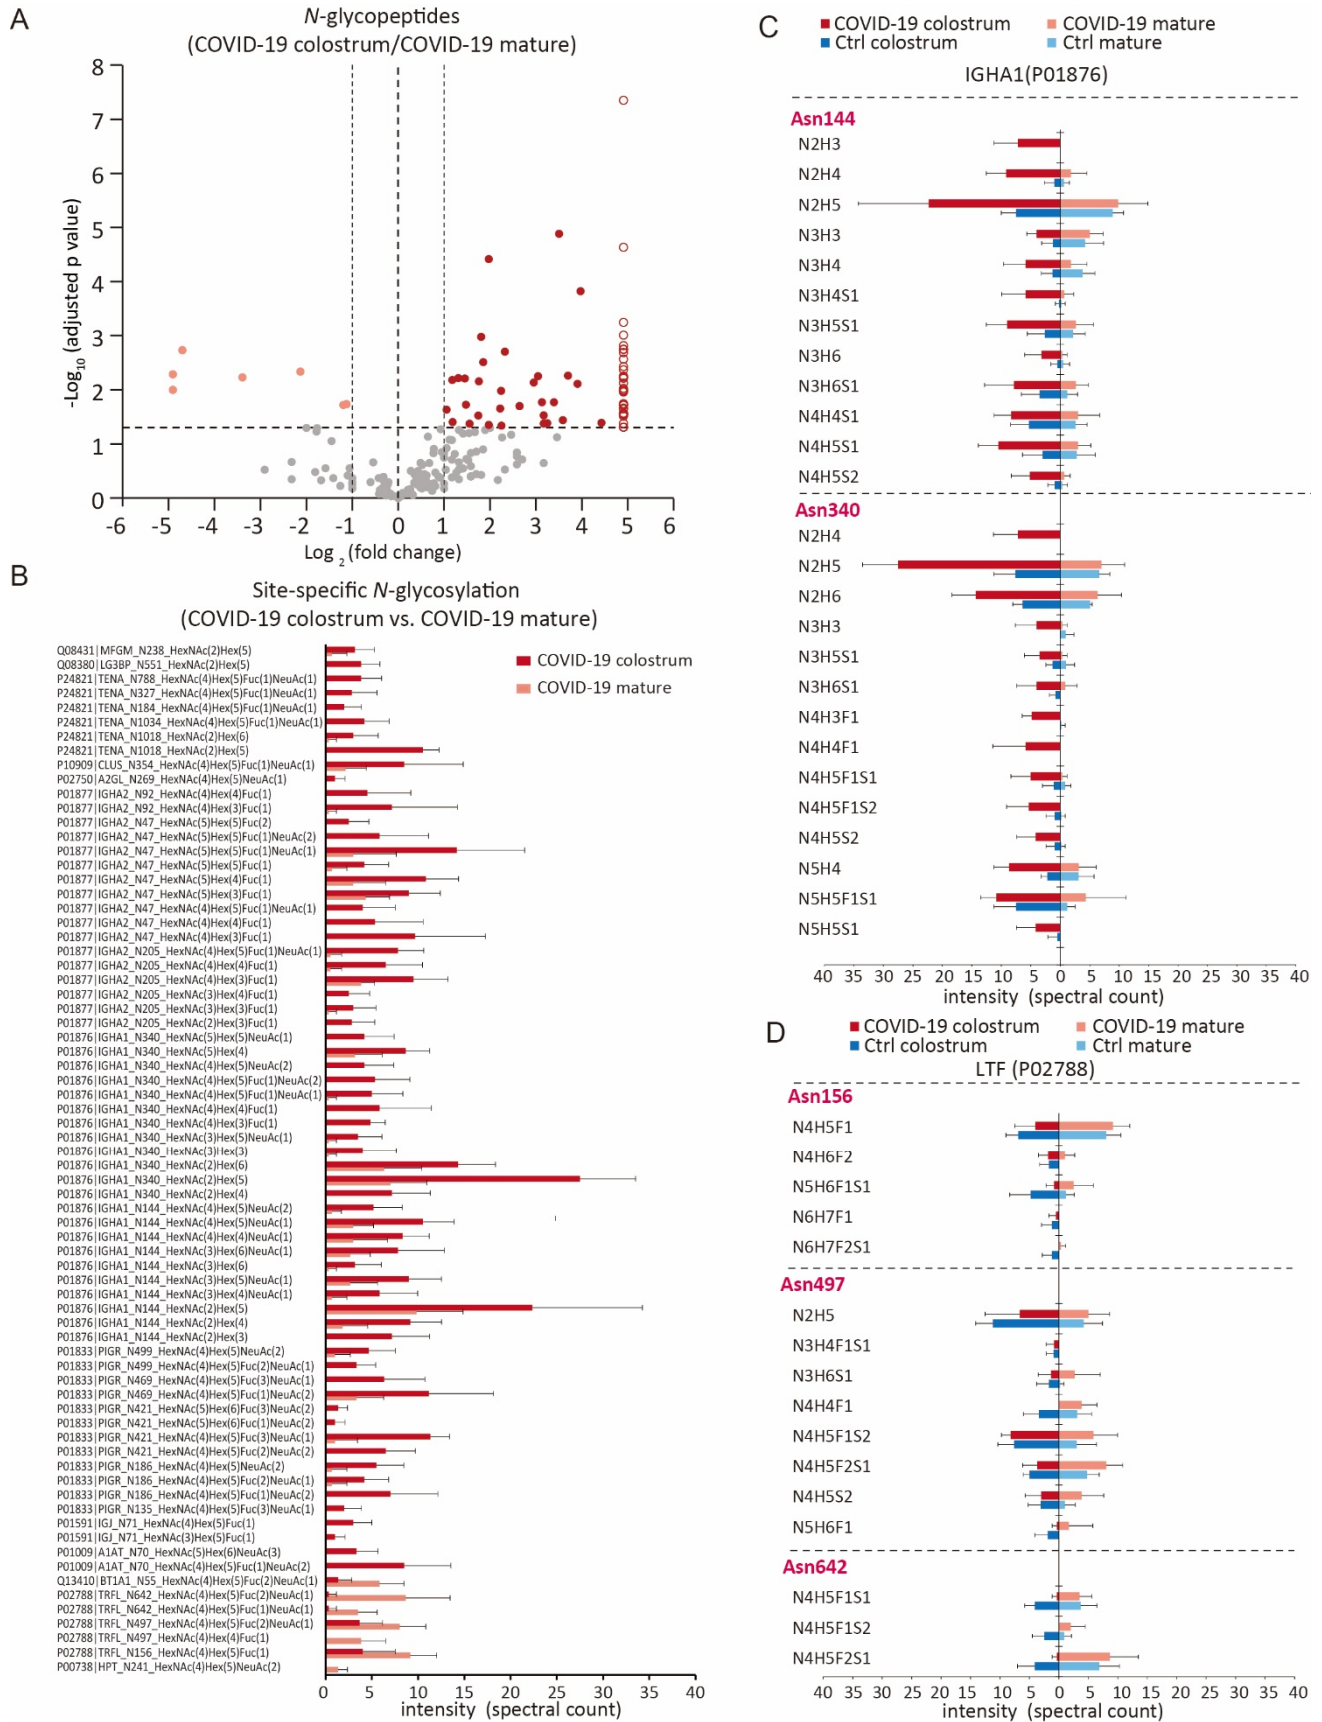

**Figure S4.** Comparisons of the N-glycoproteome profiles between the four sample groups. **(A)** A volcano plot showing changes in glycopeptides during milk maturation. The open circles represent glycopeptides that were



exclusively detectable in the COVID-19 colostrum group; their abundances in the COVID-19 mature group were manually set as a fixed minimum quantitative value, thereby giving rise to an identical fold-change value in the plot. (B) A bar graph showing changes in site-specific *N*-glycosylation during milk maturation. (C) Comparisons of site-specific immunoglobulin heavy constant alpha 1 (IGHA1) *N*-glycopeptides in the four sample groups. (D) Comparisons of site-specific lactoferrin (LTF) *N*-glycopeptides in the four sample groups. Bars indicate means and whiskers indicate SDs.

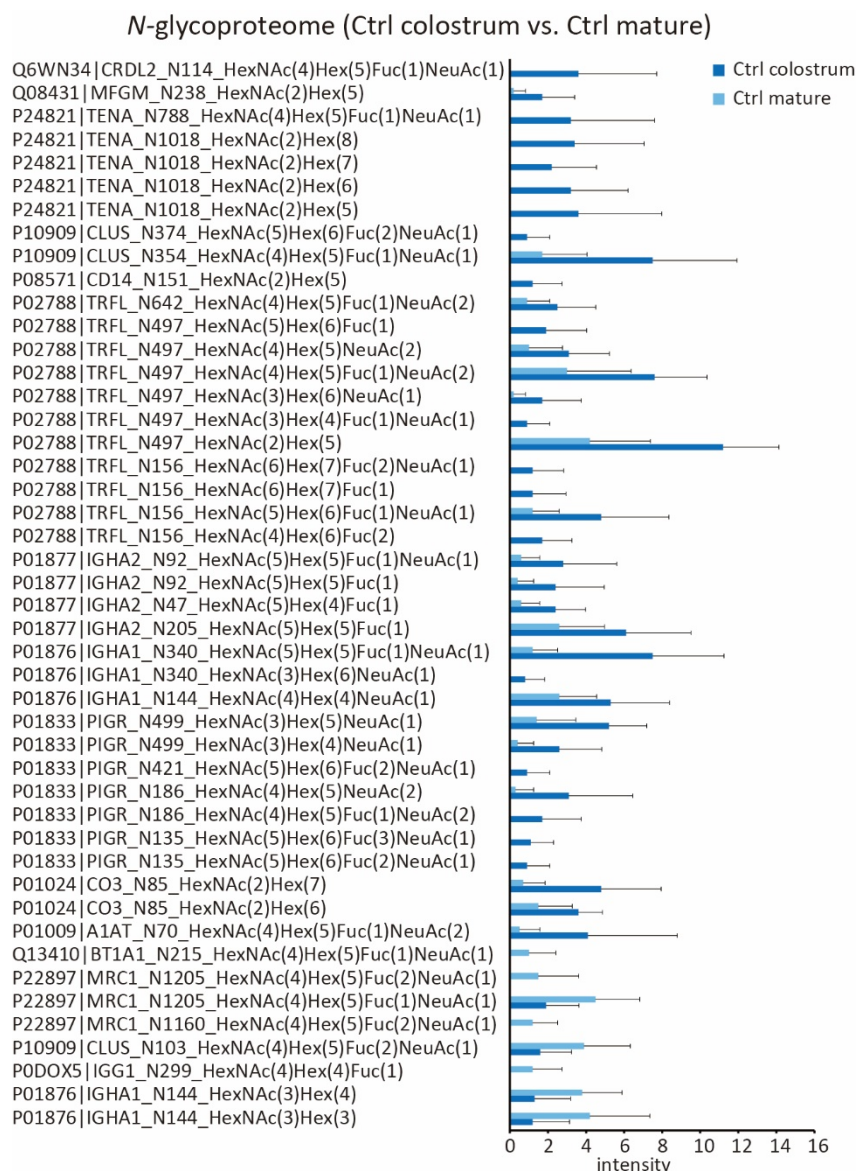

**Figure S5.** Changes in site-specific *N*-glycosylation during maturation of breastmilk from healthy women (Ctrl groups). Bars indicate means and whiskers indicate SDs.

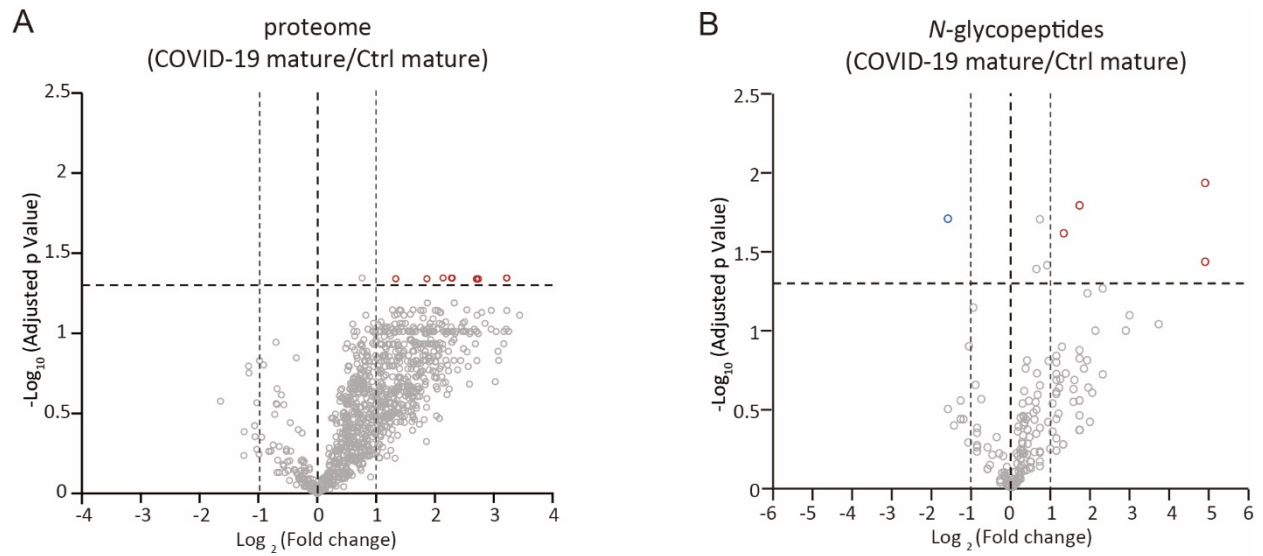

**Figure S6.** Comparisons of the proteome (A) and glycoproteome (B) profiles between mature milk samples from COVID-19 patients (COVID-19 mature) and healthy women (Ctrl mature). The red dots in the volcano plots indicate up-regulated (A) proteins and (B) N-glycopeptides in COVID-19 milk and the blue dots indicate the down-regulated ones.

## SUPPLEMENTARY TABLE CAPTIONS

**Table S1.** List of proteins identified in all sample groups

**Table S2.** Enriched gene ontology (GO) terms associated with the differentially expressed proteins in COVID-19 colostrum and Ctrl colostrum sample groups

**Table S3.** Enriched GO terms associated with the differentially expressed proteins in COVID-19 colostrum and COVID-19 mature sample groups

**Table S4.** Peptide to spectrum matches (PSMs) of identified glycopeptides

**Table S5.** List of unique *N*-glycopeptides
